# **Identification and qualification of 500 nuclear, single-copy, orthologous genes for the Eupulmonata (Gastropoda) using transcriptome sequencing and exon-capture**

Luisa C. Teasdale<sup>1,2</sup>, Frank Köhler<sup>3</sup>, Kevin D. Murray<sup>4</sup>, Tim O'Hara<sup>1</sup>, and Adnan Moussalli<sup>1</sup>

<sup>1</sup> Sciences Department, Museum Victoria, 11 Nicholson St, Carlton, Vic, Australia 3053

<sup>2</sup> School of BioSciences, The University of Melbourne, Parkville, Vic, Australia 3010

<sup>3</sup> Australian Museum, 6 College Street, Sydney, NSW, Australia 2010

<sup>4</sup> Division of Plant Sciences, Research School of Biology, Australian National University, Australia 0200

Corresponding author: Luisa Teasdale, Mailing address: Sciences Department, Museum Victoria, 11 Nicholson St, Carlton, Vic, Australia 3053, Fax Number: + 61 3 8341 7442, Email: lteasnail@gmail.com

Key words: orthology, single-copy, phylogenomics, Pulmonata, transcriptome, targeted enrichment

Running header: Orthologous genes for Eupulmonata

## ABSTRACT

The qualification of orthology is a significant challenge when developing large, multi-loci phylogenetic datasets from assembled transcripts. Transcriptome assemblies have various attributes, such as fragmentation, frameshifts, and mis-indexing, which pose problems to automated methods of orthology assessment. Here, we identify a set of orthologous single-copy genes from transcriptome assemblies for the land snails and slugs (Eupulmonata) using a thorough approach to orthology determination involving manual alignment curation, gene tree assessment and sequencing from genomic DNA. We qualified the orthology of 500 nuclear, protein coding genes from the transcriptome assemblies of 21 eupulmonate species to produce the most complete gene data matrix for a major molluscan lineage to date, both in terms of taxon and character completeness. Exon-capture of the 500 genes for 22 species of Australian Camaenidae successfully captured sequences of 2,825 exons, with only a 3.7% reduction in the data matrix due to the presence of putative paralogs or pseudogenes. The automated pipeline Agalma retrieved the majority of the manually qualified 500 single-copy gene set and identified a further 375 putative single-copy genes, although it failed to account for fragmented transcripts resulting in lower data matrix completeness. This could potentially explain the minor inconsistencies we observed in the supported topologies for the 21 eupulmonate species between the manually curated and Agalma-equivalent dataset (sharing 458 genes). Overall, our study confirms the utility of the 500 gene set to resolve phylogenetic relationships at a broad range of evolutionary depths, and highlights the importance of addressing fragmentation at the homolog alignment stage.

## INTRODUCTION

Robust and well resolved phylogenies document the evolutionary history of organisms and are essential for understanding spatio-temporal patterns of phylogenetic diversification and phenotypic evolution. Despite the central role of phylogenies in evolutionary biology, most phylogenetic studies in non-model systems have relied on a limited number of readily sequenced genes due to cost restrictions and availability of phylogenetic markers. However, both theoretical and empirical studies have shown that a greater number of independently evolving loci are needed to resolve difficult phylogenetic questions (Gontcharov *et al.* 2004; Wortley *et al.* 2005; Leaché & Rannala 2011). This need has spurred rapid advances in phylogenomics, which capitalise on high-throughput sequencing to acquire large multi-loci datasets. In particular, both transcriptome sequencing and targeted-enrichment strategies are increasingly being employed to reconstruct phylogenetic relationships across a wide range of taxonomic levels (e.g. Bi *et al.* 2012; Lemmon *et al.* 2012; Faircloth *et al.* 2012; Zapata *et al.* 2014; O'Hara *et al.* 2014; Misof *et al.* 2014). A common aim of these studies, especially targeted enrichment based studies, has been to identify universal sets of orthologous loci that can readily be captured and sequenced across a broad taxonomic spectrum (e.g. Lemmon *et al.* 2012; Faircloth *et al.* 2012; Hugall *et al.* 2015). Obtaining such universal sets of orthologous genes allows for consistency and comparison across studies, and ultimately contributes towards a more comprehensive Tree of Life (ToL) meta-analysis.

One of the greatest challenges associated with developing large, multi-loci phylogenomic datasets is the qualification of orthology. In the context of phylogenetic analysis, genes need to be orthologous and single-copy across all taxa under study (Fitch 2000; Philippe *et al.* 2011; Struck 2013). To this end, a number of automated pipelines

have been developed to identify single-copy orthologous genes from assembled transcriptomes. These methods generally involve two main steps. The first step is to identify and cluster homologous sequences, either by direct reference to annotated genomes (e.g., O'Hara *et al.* 2014) or by reference to ortholog databases, which themselves are derived from genome comparisons (e.g., Tatusov *et al.* 2003; Ranwez *et al.* 2007; Waterhouse *et al.* 2013; Altenhoff *et al.* 2015). Alternatively, non-reference methods have been employed such as all-by-all and reciprocal BLAST comparisons (Li *et al.* 2003; Dunn *et al.* 2013) followed by clustering (Enright *et al.* 2002). In the second step, orthology is qualified using either similarity based approaches, including best-hit reciprocal blasts (Ebersberger *et al.* 2009; Waterhouse *et al.* 2013; Ward & Moreno-Hagelsieb 2014), and/or tree based methods, where gene trees are used to identify sequences with purely orthologous relationships (e.g., Agalma, Dunn *et al.* 2013; PhyloTreePruner, Kocot *et al.* 2013).

Despite rapid advances in automated approaches to homolog clustering and qualifying orthology, there are many characteristics of transcriptome assemblies that challenge such automated methods. These include frameshifts, mis-indexing, transcript fragmentation and the presence of multiple isoforms. Not accounting for these issues can lead to erroneous inclusion of paralogous sequences and/or the inadvertent removal of appropriate orthologous sequences (Martin & Burg 2002; Pirie *et al.* 2007; Philippe *et al.* 2011). To address these issues O'Hara *et al.* (2014) placed greater emphasis on careful manual curation and editing of homolog alignments prior to ortholog qualification. A key aspect of this approach was the concatenation of transcript fragments into a single consensus sequence prior to tree-based ortholog qualification, leading to a more complete final data matrix. This, in turn, allowed a more robust probe design for subsequent exon-

capture (Hugall *et al.* 2015). With the same objective of deriving a gene set appropriate for exon-capture, here we implement this approach to identify and qualify 500 single-copy orthologous genes for the Eupulmonata, a major lineage of air breathing snails and slugs within the class Gastropoda.

Eupulmonata comprises over 24,000 species, with an evolutionary depth spanning over 150 million years (Jörger *et al.* 2010). The evolutionary relationships of the Eupulmonata, however, remain incompletely understood despite many morphological and molecular phylogenetic studies over the last two decades (e.g., Ponder & Lindberg 1997; Wade *et al.* 2001, 2006; Grande *et al.* 2004; Dinapoli & Klussmann-Kolb 2010; Holznagel *et al.* 2010; Dayrat *et al.* 2011). The lack of congruence between studies is largely due to a combination of using insufficient genetic markers (Schrödl 2014) and widespread morphological convergence (Dayrat & Tillier 2002). Therefore to resolve the ‘tree of life’ of the eupulmonates, it is essential to identify more independently evolving markers with a greater range of substitution rates to better estimate relationships across all evolutionary depths. To achieve this, we sequenced and assembled transcriptomes for representatives of 15 families across Eupulmonata. We used the owl limpet genome, *Lottia gigantea*, as a reference to identify and cluster homologous sequences and manually curated all homolog alignments accounting for transcript fragmentation, mis-indexing and frameshifts. We then qualified orthology by assessing individual gene trees and by sequencing the orthologous gene set from genomic DNA using target enrichment. Lastly, as a comparison and qualification of our approach we also analysed our transcriptome dataset using the fully automated orthology determination pipeline Agalma (Dunn *et al.* 2013).

## METHODS

## Transcriptome sequencing and assembly

We sequenced transcriptomes for 21 species of terrestrial snails and slugs representative of 15 families across Eupulmonata (Table 1). Total RNA was extracted from foot or whole body tissue stored in RNAlater (Ambion Inc, USA) using the Qiagen RNeasy extraction kit (Qiagen, Hilden, Germany). Library preparations were conducted using the TruSeq RNA sample preparation kit v2 (Illumina Inc., San Diego, CA), and sequenced on the Illumina HiSeq 2000 platform (100 bp paired end reads). We used the program Trimmomatic v0.22 (Lohse *et al.* 2012) to remove and trim low quality reads and adaptor sequences, and the program Trinity v2012-06-08 (Grabherr *et al.* 2011; Haas *et al.* 2013) with default settings to assemble the transcriptomes.

## Homolog clustering and orthology assessment

Our approach to homolog clustering and orthology qualification is largely consistent with that detailed in O'Hara *et al.* (2014). A schematic representation of our pipeline is provided in Figure 1. To generate clusters of putatively homologous sequences we first compared each assembly to the *Lottia gigantea* predicted gene dataset (hereon referred to as the *L. gigantea* genes) using blastx with an e-value cut off of 1e-10. The *L. gigantea* gene dataset comprises 23,851 filtered gene models annotated in the most current draft genome (Grigoriev *et al.* 2012; Simakov *et al.* 2013). Only the top hit based on the lowest e-value was retained. A relatively relaxed e-value cut-off was used to ensure all closely related homologs were assessed.

We ran an all-by-all BLAST of the *L. gigantea* gene dataset against itself (blastp, cut off e-value of 1e-10) to identify paralogs within the *L. gigantea* genome, retaining all hits. To qualify the all-by-all BLAST results, we also obtained orthology status for all *L.*

*gigantea* genes classified in the OMA ortholog database (Altenhoff *et al.* 2015). While this information provided guidance, we were not reliant on it when prioritising homolog clusters to assess. Specifically, we considered *L. gigantea* to be sufficiently divergent from the eupulmonates (> 400 million years, Zapata *et al.* 2014) that single copy status could differ. To identify candidate single copy genes for the eupulmonates we concatenated the BLAST results across all species, including the reference all-by-all BLAST, and sorted this by *L. gigantea* gene. Hence, a homolog cluster is considered here as that containing 1) all contigs from all species that had a match to a given reference *L. gigantea* gene, and 2) all contigs having a hit to any of the closely related *L. gigantea* genes identified by the all-by-all BLAST. The resulting clusters were then translated and aligned using ClustalW (Thompson *et al.* 1994), using the program BioEdit (Hall 1999).

To maintain consistency across studies, we first assessed homolog alignments corresponding to the 288 *L. gigantea* genes used in a phylogenomic study of the Mollusca (Kocot *et al.* 2011). Although there are two other published molluscan phylogenomic datasets (Smith *et al.* 2011; Zapata *et al.* 2014), we focussed on the final dataset of Kocot *et al.* (2011) as this was well annotated in reference to the *L. gigantea* gene dataset. After qualifying the subset of genes from the Kocot *et al.* study that were single copy across all the eupulmonates considered here, we proceeded to assess and qualify additional homolog clusters until we obtained a final set of 500 single-copy orthologous genes. This dataset size was chosen to represent a balance between phylogenetic power at varying time scales (Leaché & Rannala 2011; Philippe *et al.* 2011; Lemmon & Lemmon 2013) and a suitable size for subsequent exon-capture probe design. Accordingly, we prioritised homolog clusters with high taxonomic representation ( $\geq 18$  taxa) as completeness of the data matrix is critical for designing baits across multiple lineages (Lemmon *et al.* 2012; Hugall *et al.*

2015). Where possible we also prioritised genes for which the coding region (CDS) was  $\geq$  300bp, or which had at least one exon  $\geq$  200bp.

When assessing the orthology of homolog clusters, we only considered the coding region (i.e. untranslated regions (UTRs) were removed). We manually corrected frameshifts and removed both clearly erroneous sequences (highly divergent with poor blast e-values) and redundant sequences (transcripts identical within the aligned coding region). Mis-indexing was identified as cases where two sequences for the same region were present but one (typically just a fragment) matched exactly the sequence for another taxon. Taxa containing paralogs were clearly evident by generally having  $> 5\%$  dissimilarity at the nucleotide level. To further qualify that paralogs were present we inspected genealogies constructed using the neighbour joining method in MEGA (see Figure S1). Any homolog cluster containing paralogs for any species was excluded from further consideration. In certain cases paralogous sequences were closely related, representing either in-paralogs (see Remm *et al.* 2001) or genes exhibiting elevated allelic diversity (see O'Hara *et al.* 2014). These also were excluded from further consideration as such genes are not optimal for exon-capture with greater taxonomic sampling. In the case of fragmented transcripts, consensus sequences were produced if the overlapping regions did not differ by more than three nucleotides. Non-overlapping fragments were also concatenated if there were no other competing contigs and they displayed a high degree of sequence similarity to closely related taxa.

As a proxy measure of substitution rate variation across the final 500 gene set we calculated uncorrected distances (p-distance) for species pairs within the families Rhytididae (*Terrycarlessia turbinata* and *Victaphanta atramentaria*) and Camaenidae (*Sphaerospira fraseri* and *Austrochloritis kosciuszkoensis*). We chose to limit this analysis



to intrafamilial comparisons to avoid underestimation due to saturation. For comparison, we also calculated the p-distances for two commonly used phylogenetic markers, CO1 and 28S, for the same taxa.

### *Qualification of orthology using TreSpEx*

Although only a single copy of each gene per taxon was present in our final ortholog alignments, they may nevertheless be paralogous (see Struck 2014). To investigate this we used the program TreSpEx (Struck 2014) to assess genealogies for conflict with *a priori* taxonomic hypotheses. Gene trees for each of the 500 genes were constructed using the GTRGAMMA model, codon specific partitioning, and 100 fast bootstraps in RAxML (Stamatakis 2006). TreSpEx then searched for well supported conflicting phylogenetic signal relative to five distinct and taxonomically well-established eupulmonate clades (Limacoidea, Orthurethra, Helicoidea, the Australian Rhytididae (Table 1: see Hausdorf 1998; Wade *et al.* 2006, 2007; Herbert *et al.* 2015), and the Stylommatophora). All nodes with  $\geq 75$  bootstrap support were assessed for conflict with the monophyly of each of the five clades. Strongly supported sister relationships between sequences from different clades can indicate the presence of ‘hidden’ paralogous sequences. TreSpEx also flags very short terminal branches as indicative of potential cross-contamination and internal branches which are five times greater than the average, which, in addition to strong nodal support, may indicate paralogy.

### *Qualification of orthology using exon-capture*

To further qualify orthology and identify unexpressed paralogs and pseudogenes, we designed an exon-capture probe set to enrich and sequence 1,646 exons, representative of 490 of the final gene set, from genomic DNA. We used MYbaits (MYcroarray, Ann

Arbor, Michigan) custom biotinylated 120bp RNA baits at 2X tiling. We designed the baits based on two species of Australian Camaenidae, *Sphaerospira fraseri* and *Austrocholritis kosciuszkoensis* as a test case as the divergence across the eupulmonates is too large for a single probe design. Exon boundaries were delineated as per the *L. gigantea* genome and all exons shorter than 120bp (the probe length) were excluded (ten genes contained only exons shorter than 120bp).

We tested the probe set on 22 species belonging to the family Camaenidae, spanning much of the phylogenetic breadth of the Australasian radiation, representing up to 30 million years (My) of evolution (Hugall & Stanisic 2011) (Table 2). DNA was extracted using the DNeasy blood and tissue kit (Qiagen) and sheared using the Covaris S2. Libraries were then constructed using the Kapa DNA Library Preparation Kit (Kapa Biosystems, USA), modified to accommodate dual-indexing using the i7 and i5 index sets (see Hugall *et al.* 2015). Up to eight libraries (normalised to 100 ng each) were pooled per capture, and hybridised to the baits (at one-quarter dilution) for 36 hours, following the MYbait protocol v1. A second hybridisation was then carried out on the fragments retained from the first hybridisation to further enrich the capture. The captured fragments were sequenced on the Illumina MiSeq platform (v2), obtaining 150bp paired-end reads.

We used FastUniq (Xu *et al.* 2012) to remove duplicates, and Trimmomatic v0.22 (Bolger *et al.* 2014) to trim and remove low quality reads and adaptor sequences (minimum average quality score threshold of 20 per 8nt window). Reads shorter than 40 bases after trimming were discarded. The trimmed reads were then mapped onto the transcriptome sequences used for the probe design using BFAST (Homer *et al.* 2009) with a single index of 22nt without mismatch. After creating pileup files using Samtools (Li *et al.* 2009), VarScan v2.3.7 (Koboldt *et al.* 2012) was used to call variants and produce a

final consensus. To flag potential pseudogenes and paralogs we identified consensus sequences with an elevated proportion of variable sites (> 3% heterozygote sites) and reviewed the corresponding read alignments (BAM files) using the Integrative Genomics Viewer (IGV: Thorvaldsdóttir *et al.* 2013). All sequences with greater than 3% ambiguous sites were removed from the final dataset. Exons where more than 10% of the taxa contained greater than 3% ambiguous sites were discarded entirely.

We again used TreSpEx to assess conflicting phylogenetic signal. We screened for hidden paralogs based on five *a priori* phylogenetic hypotheses representing well supported clades within the Australian camaenid radiation as delineated by Hugall and Stanisic (2011), namely the Hadroid group (clade 1 – 4 inclusive), the far-northern (sister clades 5 and 6) and north-eastern (clade 7) Chloritid groups, a group dominated by arid and monsoonal camaenids (clade 11) previously recognised as the subfamily Sinumeloninae (e.g. Solem 1992), and a phenotypically and ecologically diverse group dominated by eastern Australian wet forest taxa (sister clades 8 and 9). Gene trees for each of the 490 genes (constituent exons were combined as one partition) were constructed using the GTRGAMMA model and 100 fast bootstraps in RAxML (Stamatakis 2006).

### ***Comparison to the Agalma pipeline***

As an independent qualification of the manually curated 500 gene set we ran the fully automated orthology determination pipeline Agalma (Dunn *et al.* 2013) (Figure 1). We commenced this pipeline from the ‘postassemble’ step which first identified open reading frames and putative coding regions (Dunn *et al.* 2013). Homolog clusters were then identified using an all-by-all tblastx, followed by clustering using the Markov Clustering algorithm (MCL) (Figure 1). Homolog clusters were then translated and aligned using MAFFT (Katoh & Standley 2013) and gene trees estimated using RAxML. To

identify orthologous sequences, the genealogies were then screened for ‘optimally inclusive subtrees’ which contain only a single representative of each species. Multiple orthologous subtrees can be delineated per homolog cluster, potentially allowing paralogs to be separated and retained. The surviving subtrees were filtered based on the number of taxa (set to greater than four taxa) and realigned for subsequent phylogenetic analysis.

### ***Phylogenetic analysis***

We reconstructed maximum likelihood trees using the program RAxML (Stamatakis 2006) for datasets resulting from both the manual curation and the Agalma pipeline. PartitionFinder (Lanfear *et al.* 2012) was used to identify suitable models and partitioning schemes, implemented with 1% heuristic r-cluster searches, optimized weighting, RAxML likelihood calculations, and model selection based on BIC scores. In all cases, nodal support was assessed by performing 100 thorough bootstraps. We analysed two datasets resulting from the Agalma pipeline. The first dataset comprised ortholog clusters that corresponded to the manually curated 500 gene set (here on referred to as the Agalma equivalent dataset). The second dataset consisted of all ortholog clusters which had high taxon coverage ( $\geq 18$ ), and were derived from homolog clusters containing only a single ortholog cluster (from here on referred to as the Agalma best dataset); that is, Agalma homolog clusters containing multiple copies, albeit diagnosable, were not considered further.

We also reconstructed a phylogeny for the camaenid dataset obtained through exon-capture and included sequences from the five camaenid transcriptomes presented herein, as well as sequences of *Cornu aspersum* as an outgroup. In the case of the manually curated transcriptome dataset, regions difficult to align across all taxa were manually masked out. Gblocks (Castresana 2000) was used to remove any additional regions of

ambiguous alignments from the manually curated dataset as well as the exon-capture data matrix.

## RESULTS

### *Transcriptome assembly and homolog clustering*

The number of paired reads obtained for each of the 21 eupulmonate species sequenced ranged from 7.8M to 31.6M (Table 3). Trimming and de novo assembly statistics are presented in Table 3. The number of *L. gigantea* reference genes with BLAST matches ranged from 7,011 to 9,699 per assembly (Table 3), 5,490 of which had homologous sequences in at least 18 of the 21 transcriptome assemblies.

Of the 288 genes used in a previous molluscan phylogenomic study (Kocot *et al.* 2011) 130 were single-copy for all eupulmonates considered here, while 146 contained paralogs in at least one species (mean p-distance between paralogs of 0.28, ranging from 0.16-0.46). We could not unambiguously qualify the remaining 12 genes from this study as they were poorly represented in our transcriptomes. Prioritising genes with high taxon coverage and long exon length, we assessed alignments of candidate homolog clusters until we reached 500 single-copy genes. In addition to the 146 Kocot genes shown to be paralogous within the eupulmonates, we identified and qualified 62 multi-copy genes during the course of this work. The final single-copy gene set is 98.5% taxa complete (i.e. sequence present for each gene and taxon) and 93.1% character complete (Figure 4d), with an average gene length of 1,190nt, ranging from 228nt to 6,261nt. In total, the final alignment of this gene set represents 512,958nt. Approximately 12% of the sequences in the final gene-by-species matrix were derived by concatenating fragmented transcripts.

Based on the all-by-all BLAST of the *L. gigantea* genes, 347 of our final 500 genes had a single hit at an e-value threshold of 1e-10 (i.e. single copy status was consistent between the *L. gigantea* reference and the eupulmonates), while the remainder had multiple hits, indicative of the presence of close paralogs in the reference. Conversely, of the 208 genes qualified as multiple-copy for the eupulmonates (146 from the Kocot gene set plus 62 from this study), 134 only had one hit within the *L. gigantea* gene set (i.e. just over half of the multiple-copy gene set are potentially single copy for patellogastropods). These results broadly correspond to the orthology designation in the OMA (Orthologous MAtrix) database.

Across the 500 single-copy genes, the p-distance between the two rhytidids, *Terrycarlessia turbinata* and *Victaphanta atramentaria*, ranged from 0.02 to 0.13 (average of 0.06; Figure 3). This family is thought to have originated 120 Mya (Bruggen 1980; Upchurch 2008). However, the Australian rhytidids probably represent a more recent radiation (Herbert et al. 2015, Moussalli and Herbert 2016). Similarly, p-distance between the two camaenids, *Sphaerospira fraseri* and *Austrochloritis kosciuszkoensis*, ranged from 0.01 to 0.13 (average of 0.04). This group is thought to have originated in the Oligo-Miocene approximately 30 Mya (Hugall & Stanisic 2011). All genes had a higher relative substitution rate than the commonly used phylogenetic marker 28S, and were on average approximately four times slower than COI (Figure 3).

### ***Orthology qualification using TreSpEx***

TreSpEx analyses of all 500 genes found no well supported conflict with the *a priori* phylogenetic hypotheses, suggesting that hidden paralogs (i.e., genes represented by a single sequence per taxon yet paralogous across multiple taxa) were absent from our

dataset. Furthermore, this analysis also showed no evidence of cross sample contamination, nor any evidence of suspect long internal branches within the Stylommatophora.

### *Qualification of orthology using exon-capture*

We enriched and sequenced all 1,646 targeted exons when considering all 22 samples collectively. We first mapped reads to the original reference used in the probe design with exon boundaries delineated based on the *L. gigantea* genome. Examination of the resulting read alignments (BAM files) identified 437 reference exons which contained multiple internal exon boundaries within the Camaenidae (Figure S4). Accordingly, the mapping reference was modified to account for exon-splitting (including the removal of 163 exons that were shorter than 40 bp after splitting), with the final revised reference comprising 2,648 exons representing 417,846nt (Supplementary Table 1).

We then remapped reads to the revised reference (coverage and specificity statistics presented in Table 4) and flagged resulting consensus sequences which exhibited elevated polymorphism (> 3% heterozygote sites). There were 508 exons where at least one taxon exhibited elevated polymorphism. Of these, 105 exons had greater than 10% of the taxa (typically two or more taxa, taking into account missing taxa) exhibiting elevated polymorphism. Based on an examination of the corresponding read alignments (i.e. BAM files), 95 exons were classified as having lineage specific pseudogenes or paralogs, four contained evidence of processed pseudogenes, and six where the alignment was complicated by the mapping of unrelated reads containing small, highly similar domains (see Figure S4-S8 for examples of each case). These 105 exons were removed prior to phylogenetic analyses. For the remaining 403 exons only the consensus sequences for the taxa with elevated polymorphism were removed from the final alignment. In total, 3.7% of

the sequences were removed from final data matrix due to elevated polymorphism. The final data matrix was 98% taxa complete and 95% character complete.

Based on the TreSpEx analyses, four genes did not support the monophyly of the ‘Far North Chloritid’ group, but rather placed (*Nannochloritis layardi* and *Patrubella buxtoni*) as sister to the ‘North-East Chloritid’ group (Figure 5). We concluded that this was not the result of hidden paralogy, but rather due to insufficient lineage sorting of relatively conserved genes. An additional five genes were in conflict with the *a priori* taxonomic hypotheses, however, these represented cases where the genes were small and the proportion of phylogenetically informative sites was low. Five genes were flagged as having at least one internal branch which was greater than five times the average. Assessment of the alignments and corresponding genealogies indicated that they represented deep basal divergence between well supported major clades, and was not reflective of hidden paralogy.

Finally, we enriched another representative of *Sphaerospira fraseri*, one of the reference species used in the probe design. Comparing the mapped consensus genomic sequence to the transcriptome reference we found only minor mismatch, reflective of intraspecific variation as the two samples came from different populations. Furthermore, for this species at least, all reference genes constructed from multiple transcript fragments were consistent with those captured from genomic DNA (i.e. chimeras of unrelated fragments were not created).

### ***Comparison to Agalma pipeline***

Using the Agalma pipeline we identified 11,140 ortholog clusters. Of these ortholog clusters 635 corresponded to 457 of our 500 single-copy gene set. We refer to this



dataset as the “Agalma equivalent” dataset, and is 61% taxa complete and 54% character complete. Many of the genes were represented by multiple ortholog clusters in the Agalma analysis, many of which contained fewer taxa relative to that obtained via manual curation (Figure 3). Rather than paralogs, in all cases fragmentation in the transcriptome assemblies resulted in the splitting of homolog clusters into multiple ortholog clusters, each representing the same locus but containing a different subset of taxa (see example in Figure S3). Of the 43 single-copy genes not picked up by Agalma, five were not annotated in the ‘postassemble’ step, 12 were annotated but not recovered by the all-by-all BLAST, 18 were recovered by the all-by-all BLAST but dropped during the clustering step, and eight made it to the initial clusters but failed the alignment and trimming step prior to the gene tree reconstruction. Failure to recover these genes during the BLAST comparison, clustering and alignment steps is most likely due to a combination of frameshift errors and transcript fragmentation, and in certain cases, resulting in the taxon sampling threshold and cluster size criteria not being met.

Of the 11,140 ortholog clusters there were 546 clusters that contained sequences of at least 18 taxa and that had one ortholog cluster per homolog cluster. Of these, 171 were also contained in our 500 single-copy gene set. Hence, the Agalma pipeline identified 375 genes in addition to the 500 manually curated genes, which had optimum taxon sampling. The majority of these genes also represented the full CDS with 89% representing at least 80% of the length of the respective *L. gigantea* gene. We refer to this dataset as the “Agalma best” dataset and is 92% taxa complete and 85% character complete.

### ***Phylogenetic analysis***

We reconstructed phylogenies from three ortholog datasets for comparison: (1) the manually curated 500 single-copy gene set (Figure 4a, d), (2) the Agalma equivalent

dataset consisting of 635 orthologous clusters which corresponded to 457 of the 500 single-copy genes (Figure 4b, e), and (3) the Agalma best dataset consisting of 546 orthologous clusters which had 18 or more taxa and were the only orthologous cluster from the respective homolog cluster (Figure 4c, f). Of the manual curated dataset, 1.6% of the alignment was removed by Gblocks prior to phylogenetic analysis. The phylogenies for the 500 single-copy gene set and the Agalma best dataset had identical topologies, supporting all major clades with very high bootstrap support, namely Helicoidea, Limacoidea, Orthurethra, the Australian rhytidids and the Stylommatophora (Figure 4a, c). In terms of phylogenetic relationships, the Rhytididae forms a sister relationship with the Limacoidea, and the Helicoidea occupies a basal position within Stylommatophora. In contrast, while also supporting the monophyly of all major clades, the phylogeny based on the ‘Agalma equivalent’ dataset places Orthurethra in a basal position within Stylommatophora, (Figure 4b).

Of the Camaenidae exon capture dataset, 5% of the alignment was removed by Gblocks prior to phylogenetic analysis. The resulting phylogeny supported all major groups previously recognised by Hugall and Stanisic (2011). In terms of phylogenetic relationships, the two Chloritid groups formed a clade with the Hadroid group, with the Far-northern chloritids sister to the hadroids. There was poor resolution regarding the phylogenetic positions of the two remaining groups, the Eastern rainforests and the arid and monsoonal NW Australian clades (Figure 5).

## DISCUSSION

The identification and qualification of orthology is a critical prerequisite for sound phylogenetic inference. Our approach of orthology assessment involved an initial

assessment and manual editing of homolog clusters, allowing us to correct for multiple isoforms and errors such as sequence fragmentation, frame-shifts and mis-indexing. Using this approach, we qualified the orthology and single-copy status of 500 genes across the eupulmonates, 130 of which were used in a previous phylogenomic study of the Mollusca (Kocot *et al.* 2011). The resulting 500 gene data matrix is the most complete produced for a major molluscan lineage to date, both in terms of taxon and character completeness. We further qualified orthology by capturing and sequencing 490 of the 500 genes from genomic DNA, revealing the presence of paralogs and/or pseudogenes otherwise not evident from the transcriptome data. Although the automated pipeline Agalma recovered the majority of the 500 genes as single copy and identified 375 additional putatively orthologous genes for the eupulmonates, it was hampered by fragmentation within the assemblies. Furthermore, supported topologies for the 21 eupulmonate species were not entirely consistent between the manually curated and Agalma equivalent dataset, potentially a consequence of lower data matrix completeness in the latter. We discuss approaches to ortholog determination and implications for phylogenetic inference below.

### ***Ortholog determination***

To date, transcriptome based phylogenomic studies have focused on resolving relatively deep evolutionary relationships (e.g. Kocot *et al.* 2011; Smith *et al.* 2011; Zapata *et al.* 2014; O'Hara *et al.* 2014; Misof *et al.* 2014), and a number have relied on annotated ortholog databases such as OMA (Altenhoff *et al.* 2015) and OrthoDB (Waterhouse *et al.* 2013) for the initial screening of suitable genes. Such databases are typically limited in the number of representatives per lineage (e.g., Tatusov *et al.* 2003; Ranwez *et al.* 2007; Waterhouse *et al.* 2013; Altenhoff *et al.* 2015). Nevertheless, it is a reasonable assumption that orthologous genes qualified as single-copy across many highly divergent taxa are more

likely to maintain single-copy status with greater taxonomic sampling. We tested this idea at a preliminary stage of our work by first assessing genes used in a phylogenomic study of the Mollusca (Kocot *et al.* 2011). In that study, orthologous genes were identified using the program HaMStR, based on a 1,032 ortholog set resulting from the Inparanoid orthology database (Ostlund *et al.* 2010). We found that just under half of the genes used in Kocot *et al.* (2011) were paralogous within the eupulmonates. To some extent the high proportion of the Kocot *et al.* gene set being paralogous is due to the limited representation of eupulmonates in that study, and for these few taxa paralogs may have been absent. Alternatively, in such deep phylogenomic studies lineage-specific duplication may have manifested as in-paralogs and were dealt with by retaining one copy from the in-paralog set at random (Kocot *et al.* 2011; Dunn *et al.* 2013) or based on sequence similarity (Ebersberger *et al.* 2009). However, with an increase in taxonomic sampling, such paralogy may extend across multiple taxa, and unless isorthology can be qualified (Fitch 2000), these genes would no longer be suitable for phylogenetic analysis.

When the 500 gene set was compared to the OMA database (Altenhoff *et al.* 2015), which at the time of this analysis only incorporated a single molluscan genome, namely *L. gigantea*, we found a similarly high proportion of eupulmonate specific paralogy. A more interesting result arising from this comparison, however, was that many genes classified as having putative paralogs in *L. gigantea* were single-copy across the eupulmonates. We cannot ascertain at this stage whether this is a consequence of duplication being derived within Patellogastropoda, the lineage containing *L. gigantea*, or the consequence of duplicate loss in the ancestral eupulmonate. Nevertheless, this result highlights that potentially suitable genes may be overlooked when restricted to ortholog database designations, especially when such databases have poor representation of the relevant

lineage. Accordingly, although we used the *L. gigantea* gene set as a reference with which to identify and cluster homologous sequences, we did not rely on orthology database designations of the *L. gigantea* gene set to guide our analyses.

#### ***Automated vs manually curated aided pipelines***

Pipelines that fully automate homology searches and clustering, orthology qualification, and final alignments are highly desirable for efficiency, consistency, and repeatability. Moreover, reference free methods, like that implemented in Agalma are also highly desirable in cases where the study taxa are poorly represented in ortholog databases. There are characteristics of assembled transcriptome sequences, however, that challenge fully automated methods, including fragmentation, mis-indexing and frameshifts, and these aspects necessitate careful manual appraisal and editing (Philippe *et al.* 2011; O'Hara *et al.* 2014). Although recent phylogenomic studies have, to varying degrees, incorporated manual appraisal, such checks are typically conducted at the final proofing stage (e.g. Kocot *et al.* 2011; Simmons & Goloboff 2014). In this study, we purposefully addressed the abovementioned issues at an early stage following the initial alignment of homologous sequences. The most important aspect of our manual curation was the creation of consensus sequences from fragmented transcripts (see also: O'Hara *et al.* 2014), which in turn ensured maximum retention of data and placed subsequent orthology assessment on a sounder footing. Consequently, our final data matrix was highly complete.

The Agalma analysis confirmed the single-copy, orthology status for the majority of the 500 manually curated gene set, but it was hampered by fragmentation within the transcriptome assemblies. In all cases where multiple ortholog clusters were derived using Agalma for any one of the 500 genes, this was due to fragmentation, not missed paralogy. In essence, alignments of fragmented transcripts (whether or not they were partially

overlapping) resulted in poorly reconstructed gene trees, which in turn misled subsequent tree pruning and ortholog clustering (e.g. Figure S3). Consequently, for the Agalma equivalent dataset, both taxon and character completeness was poor relative to the manually curated data matrix. To our knowledge, no fully automated phylogenomics pipeline currently implements the consensus of fragmented sequences, and studies that have made the effort to retain multiple fragments, as in this study, have decided which sequences to retain and merge manually (e.g., Rothfels *et al.* 2013; O'Hara *et al.* 2014). The issue of working with fragmented assemblies can be addressed, however, by incorporating an automated consensus making algorithm such as TGICL (Perteira *et al.* 2003) into the pipeline to address fragmentation at the homolog alignment stage. Doing so is particularly desirable, given that manual curation of homologous sequences requires considerable time investment.

A major strength of automated pipelines is that they enable a more comprehensive screening of putative orthologous genes. Manual curation requires considerable effort, and while more candidate genes were identified than were assessed, we stopped the manual assessment once our target of 500 genes had been attained. The Agalma analyses had no constraints, however, hence all possible orthologous clusters were considered. Consequently, we identified an additional 375 ortholog clusters which met a strict taxa completeness threshold (18 taxa or more) and represented the only ortholog cluster arising from original homolog clusters. While beyond the scope of this study, further qualification of these additional genes using exon-capture (see below) would be highly desirable.

### ***Phylogenetic inference***

The 500 gene set represents a significant contribution towards advancing molecular phylogenetics of the eupulmonates, providing the capacity to resolve both evolutionary

relationships at shallow to moderate depths, and deep basal relationships. The phylogenetic reconstructions presented here are well resolved and support the *a priori* taxonomic hypotheses used as part of the orthology assessment. In terms of deeper relationships, reconstructions based on the two most complete datasets are consistent, namely the monophyly of Stylommatophora, within which Helicoidea is basal, and the sister relationship between the Rhytidoidea and the Limacoidea. For the less complete Agalma equivalent dataset, however, Orthurethra is basal within Stylommatophora, albeit with marginal support. Without greater taxonomic sampling of all the major lineages within the eupulmonates, however, a comprehensive phylogenetic assessment is beyond the scope of this study. Nevertheless, these phylogenomic datasets do afford greater resolution of deeper relationships than obtained in previous molecular studies (Wade *et al.* 2001, 2006). Secondly, convergence in supported topology between the two most complete and largely independent datasets (only 171 genes were in common), and the inconsistency between the manually curated and Agalma equivalent dataset (sharing 458 genes), suggests the possible importance of data matrix completeness in resolving short, basal internodes.

### ***Exon-capture***

One of the overarching objectives of this study was to identify and qualify 500 genes suitable for exon-capture work within the eupulmonates. Here we sequenced and analysed a small dataset for the family Camaenidae principally as a means to further qualify orthology. There are two principle outcomes from this exploration. First, for all reference sequences based on the concatenation of fragmented transcripts, there was no evidence that erroneous chimeric sequences were created. Second, as was the case with the increased sampling in the transcriptome work, the pervasiveness of lineage-specific duplication was also evident from the exon-capture experiment. Despite qualification of

single-copy orthology of the transcriptome dataset, increased taxonomic sampling within the family Camaenidae revealed lineage-specific duplication for potentially as high as one fifth of the targeted exons. In the great majority of cases, however, a very small proportion of taxa exhibited putative paralogy, and removal of the affected exon per taxon only reduced the completeness of the final dataset by 3.7%. Similar results were achieved in the brittle stars with 1.5% of their target discarded due to putative paralogs or pseudogenes (Hugall *et al.* 2015).

Within the Australian Camaenidae, uncorrected distances for the majority of the genes did not exceed 13%. This level of sequence variability is within the range of mismatch that is tolerated by in-solution exon-capture protocols (Bi *et al.* 2012; Bragg *et al.* 2015; Hugall *et al.* 2015). This was qualified here given the high proportion of target recovery (>95%) across a broad representation of the camaenid diversity. As was the case for the Euplumonata phylogeny presented above, our preliminary phylogenomic dataset for camaenids provides considerable resolution, particularly among the chloritis and hadroid groups which to date have been difficult to resolve (Hugall & Stanisic 2011).

Expanding the bait design to enrich across the Australasian camaenid radiation, indeed the family Helicoidea, would require the incorporation of multiple divergent reference taxa into the bait design. Recent “anchored enrichment” approaches to bait design (e.g. Lemmon *et al.* 2012; Faircloth *et al.* 2012) target highly conserved regions to allow capture across highly divergent taxa. By contrast, the approach taken here is to target both conserved and highly variable regions, and where possible the full coding region (Bi *et al.* 2012; Bragg *et al.* 2015; Hugall *et al.* 2015), requiring substantially greater reference diversity to be incorporated into the bait design relative to the anchored approach to capture across highly divergent lineages (e.g. across families). Recently, Hugall *et al.*



(2015) used a similar approach to the one in the present study, but designed baits based on ancestral sequences, rather than representative tip taxa, to reduce the overall size of the reference set. Using this approach, Hugall *et al.* successfully enriched and sequenced both conserved and highly variable exons across the entire echinoderm class Ophiuroidea, spanning approximately 260 million years. Here we have presented a simple bait design targeting a specific family, but our transcriptome dataset could be used to produce a more diverse bait design to facilitate a more comprehensive study of Eupulmonata phylogenetics and systematics.

## ACKNOWLEDGEMENTS

We thank Andrew Hugall for bioinformatics advice and Felipe Zapata for assistance with running Agalma; Devi Stuart-Fox, Claire Mclean and Mark Phuong for critical feedback on the manuscript; and Dai Herbert for providing images for Figure 4. We also thank the staff at Australian Genome Research Facility (AGRF) and the Georgia Genomics Facility (GGF), specifically Travis Glenn and Roger Neilsen, for guidance and assistance in transcriptome and exon-capture sequencing. LT was supported by Victorian Life Science Computing Initiative (VLSCI) scholarship. The work was supported by a Holsworth Wildlife Research Endowment to LT, an Australian Biological Resources Study (ABRS) grant to FK and AM (RF213-12).

# REFERENCES

- Altenhoff AM, Skunca N, Glover N *et al.* (2015) The OMA orthology database in 2015 : function predictions, better plant support, synteny view and other improvements. *Nucleic Acids Research*, **43**, D240–D249.
- Bi K, Vanderpool D, Singhal S *et al.* (2012) Transcriptome-based exon capture enables highly cost-effective comparative genomic data collection at moderate evolutionary scales. *BMC Genomics*, **13**, 403.
- Bolger AM, Lohse M, Usadel B (2014) Trimmomatic: a flexible trimmer for Illumina sequence data. *Bioinformatics (Oxford, England)*, 1–7.
- Bragg JG, Potter S, Bi K, Moritz C (2015) Exon capture phylogenomics: efficacy across scales of divergence. *Molecular Ecology Resources*, DOI: 10.1111/1755–0998.12449.
- Bruggen AC Van (1980) Gondwanaland Connections in the Terrestrial Molluscs of Africa and Australia. *Journal of the Malacological Society of Australia*, **4**, 215–222.
- Castresana J (2000) Selection of conserved blocks from multiple alignments for their use in phylogenetic analysis. *Molecular biology and evolution*, **17**, 540–552.
- Dayrat B, Conrad M, Balayan S *et al.* (2011) Phylogenetic relationships and evolution of pulmonate gastropods (Mollusca): New insights from increased taxon sampling. *Molecular Phylogenetics and Evolution*, **59**, 425–437.
- Dayrat B, Tillier S (2002) Evolutionary relationships of euthyneuran gastropods (Mollusca): a cladistic re-evaluation of morphological characters. *Zoological Journal of the Linnean Society*, **135**, 403–470.
- Dinapoli A, Klussmann-Kolb A (2010) The long way to diversity - phylogeny and evolution of the Heterobranchia (Mollusca: Gastropoda). *Molecular phylogenetics and evolution*, **55**, 60–76.
- Dunn CW, Howison M, Zapata F (2013) Agalma: an automated phylogenomics workflow. *BMC bioinformatics*, **14**, 330.
- Ebersberger I, Strauss S, von Haeseler A (2009) HaMStR: profile hidden markov model based search for orthologs in ESTs. *BMC evolutionary biology*, **9**, 157.
- Enright AJ, Van Dongen S, Ouzounis CA (2002) An efficient algorithm for large-scale detection of protein families. *Nucleic acids research*, **30**, 1575–1584.
- Faircloth BC, McCormack JE, Crawford NG *et al.* (2012) Ultraconserved Elements Anchor Thousands of Genetic Markers Spanning Multiple Evolutionary Timescales. *Systematic biology*, **61**, 717–726.
- Fitch WM (2000) Homology: a personal view on some of the problems. *Trends in genetics*, **16**, 227–231.
- Gontcharov AA, Marin B, Melkonian M (2004) Are combined analyses better than single gene phylogenies? A case study using SSU rDNA and rbcL sequence comparisons in the Zygnematophyceae (Streptophyta). *Molecular biology and evolution*, **21**, 612–24.
- Grabherr MG, Haas BJ, Yassour M *et al.* (2011) Full-length transcriptome assembly from RNA-Seq data without a reference genome. *Nature Biotechnology*, **29**, 644–652.
- Grande C, Templado J, Cervera JL, Zardoya R (2004) Molecular phylogeny of Euthyneura (Mollusca: Gastropoda). *Molecular biology and evolution*, **21**, 303–313.
- Grigoriev I V, Nordberg H, Shabalov I *et al.* (2012) The genome portal of the Department of Energy Joint Genome Institute. *Nucleic acids research*, **40**, D26–D32.
- Haas BJ, Papanicolaou A, Yassour M *et al.* (2013) De novo transcript sequence reconstruction from RNA-seq using the Trinity platform for reference generation and analysis. *Nature protocols*, **8**, 1494–1512.

634 Hall TA (1999) BioEdit: a user-friendly biological sequence alignment editor and analysis program  
635 for Windows 95/98/NT. *Nucleic Acids Symposium Series*.

636 Hausdorf B (1998) Phylogeny of the Limacoidea Sensu Lato (Gastropoda: Stylommatophora).  
637 *Journal of Molluscan Studies*, **64**, 35–66.

638 Herbert DG, Moussalli A, Griffiths OL (2015) Rhytididae (Eupulmonata) in Madagascar: reality or  
639 conjecture? *Journal of Molluscan Studies*, **81**, 1–10.

640 Holznagel WE, Colgan DJ, Lydeard C (2010) Pulmonate phylogeny based on 28S rRNA gene  
641 sequences: a framework for discussing habitat transitions and character transformation.  
642 *Molecular phylogenetics and evolution*, **57**, 1017–25.

643 Homer N, Merriman B, Nelson SF (2009) BFAST: an alignment tool for large scale genome  
644 resequencing. *PloS one*, **4**, e7767.

645 Hugall AF, O'Hara TD, Hunjan S, Nilsen R, Moussalli A (2015) An Exon-Capture System for the  
646 Entire Class Ophiuroidea. *Molecular Biology and Evolution*.

647 Hugall AF, Stanisic J (2011) Beyond the prolegomenon: a molecular phylogeny of the Australian  
648 camaenid land snail radiation. *Zoological Journal of the Linnean Society*, **161**, 531–572.

649 Jörger KM, Stöger I, Kano Y *et al.* (2010) On the origin of Acochlidia and other enigmatic  
650 euthyneuran gastropods, with implications for the systematics of Heterobranchia. *BMC*  
651 *Evolutionary Biology*, **10**, 323.

652 Katoh K, Standley DM (2013) MAFFT Multiple Sequence Alignment Software Version 7:  
653 Improvements in Performance and Usability. *Molecular biology and evolution*, **30**, 772–780.

654 Koboldt DC, Zhang Q, Larson DE *et al.* (2012) VarScan 2: Somatic mutation and copy number  
655 alteration discovery in cancer by exome sequencing. *Genome Research*, **22**, 568–576.

656 Kocot KM, Cannon JT, Todt C *et al.* (2011) Phylogenomics reveals deep molluscan relationships.  
657 *Nature*, **477**, 452–456.

658 Kocot KM, Citarella MR, Moroz LL, Halanych KM (2013) PhyloTreePruner: A Phylogenetic Tree-  
659 Based Approach for Selection of Orthologous Sequences for Phylogenomics. *Evolutionary*  
660 *bioinformatics online*, **9**, 429–35.

661 Lanfear R, Calcott B, Ho SYW, Guindon S (2012) PartitionFinder : Combined Selection of  
662 Partitioning Schemes and Substitution Models for Phylogenetic Analyses. *Molecular biology*  
663 *and evolution*, **29**, 1695–1701.

664 Leaché AD, Rannala B (2011) The accuracy of species tree estimation under simulation: a  
665 comparison of methods. *Systematic biology*, **60**, 126–37.

666 Lemmon AR, Emme S, Lemmon EM (2012) Anchored hybrid enrichment for massively high-  
667 throughput phylogenomics. *Systematic biology*, **61**, 727–744.

668 Lemmon EM, Lemmon AR (2013) High-Throughput Genomic Data in Systematics and  
669 Phylogenetics. *Annual Review of Ecology, Evolution, and Systematics*, **44**, 99–121.

670 Li L, Stoeckert CJ, Roos DS (2003) OrthoMCL: identification of ortholog groups for eukaryotic  
671 genomes. *Genome research*, **13**, 2178–2189.

672 Lohse M, Bolger AM, Nagel A *et al.* (2012) RobiNA: a user-friendly, integrated software solution for  
673 RNA-Seq-based transcriptomics. *Nucleic Acids Research*, **40**, W622–W627.

674 Martin AP, Burg TM (2002) Perils of paralogy: using HSP70 genes for inferring organismal  
675 phylogenies. *Systematic biology*, **51**, 570–587.

676 Misof B, Liu S, Meusemann K *et al.* (2014) Phylogenomics resolves the timing and pattern of insect  
677 evolution. *Science*, **346**, 763–767.

678 O'Hara TD, Hugall AF, Thuy B, Moussalli A (2014) Phylogenomic resolution of the class  
679 Ophiuroidea unlocks a global microfossil record. *Current biology : CB*, **24**, 1874–1879.

680 Ostlund G, Schmitt T, Forslund K *et al.* (2010) InParanoid 7: new algorithms and tools for eukaryotic  
681 orthology analysis. *Nucleic acids research*, **38**, D196–203.

682 Pertea G, Huang X, Liang F *et al.* (2003) TIGR gene indices clustering tools (TGICL): A software  
683 system for fast clustering of large EST datasets. *Bioinformatics*, **19**, 651–652.

684 Philippe H, Brinkmann H, Lavrov D V *et al.* (2011) Resolving difficult phylogenetic questions: why  
685 more sequences are not enough. *PLoS biology*, **9**, e1000602.

686 Pirie MD, Vargas MPB, Botermans M, Bakker FT, Chatrou LW (2007) Ancient paralogy in the  
687 cpDNA trnL-F region in Annonaceae: implications for plant molecular systematics. *American*  
688 *Journal of Botany*, **94**, 1003–1016.

689 Ponder WF, Lindberg DR (1997) Towards a phylogeny of gastropod molluscs: an analysis using  
690 morphological characters. *Zoological Journal of the Linnean Society*, **119**, 83–265.

691 Ranwez V, Delsuc F, Ranwez S *et al.* (2007) OrthoMaM: a database of orthologous genomic markers  
692 for placental mammal phylogenetics. *BMC evolutionary biology*, **7**, 241.

693 Remm M, Storm CE V, Sonnhammer ELL (2001) Automatic Clustering of Orthologs and In-paralogs  
694 from Pairwise Species Comparisons. *Journal of molecular biology*, **314**, 1041–1052.

695 Rothfels CJ, Larsson A, Li F-W *et al.* (2013) Transcriptome-mining for single-copy nuclear markers  
696 in ferns. *PloS one*, **8**, e76957.

697 Schrödl M (2014) Time to say “Bye-bye Pulmonata”? *Spixiana*, **37**, 161–164.

698 Simakov O, Marletaz F, Cho S-J *et al.* (2013) Insights into bilaterian evolution from three spiralian  
699 genomes. *Nature*, **493**, 526–531.

700 Simmons MP, Goloboff PA (2014) Dubious resolution and support from published sparse  
701 supermatrices: The importance of thorough tree searches. *Molecular phylogenetics and*  
702 *evolution*, **78**, 334–348.

703 Smith SA, Wilson NG, Goetz FE *et al.* (2011) Resolving the evolutionary relationships of molluscs  
704 with phylogenomic tools. *Nature*, **480**, 364–367.

705 Solem A (1992) Camaenid land snails from southern and eastern Australia, excluding Kangaroo  
706 Island. *Records of the South Australian Museum, Monograph Series*, **2**, 1–425.

707 Stamatakis A (2006) RAxML-VI-HPC: maximum likelihood-based phylogenetic analyses with  
708 thousands of taxa and mixed models. *Bioinformatics*, **22**, 2688–2690.

709 Struck TH (2013) The impact of paralogy on phylogenomic studies - a case study on annelid  
710 relationships. *PloS one*, **8**, e62892.

711 Struck TH (2014) TreSpEx—Detection of Misleading Signal in Phylogenetic Reconstructions Based  
712 on Tree Information. *Evolutionary Bioinformatics*, 51–67.

713 Tatusov RL, Fedorova ND, Jackson JD *et al.* (2003) The COG database: an updated version includes  
714 eukaryotes. *BMC bioinformatics*, **4**, 41.

715 Thompson JD, Higgins DG, Gibson TJ (1994) CLUSTAL W: improving the sensitivity of progressive  
716 multiple sequence alignment through sequence weighting, position-specific gap penalties and  
717 weight matrix choice. *Nucleic acids research*, **22**, 4673–4680.

718 Thorvaldsdóttir H, Robinson JT, Mesirov JP (2013) Integrative Genomics Viewer (IGV): High-  
719 performance genomics data visualization and exploration. *Briefings in Bioinformatics*, **14**, 178–  
720 192.

721 Upchurch P (2008) Gondwanan break-up: legacies of a lost world? *Trends in ecology & evolution*, **23**,  
722 229–236.

723 Wade CM, Hudelot C, Davison A, Naggs F, Mordan PB (2007) Molecular phylogeny of the helicoid  
724 land snails (Pulmonata: Stylommatophora: Helicoidea), with special emphasis on the  
725 Camaenidae. *Journal of Molluscan Studies*, **73**, 411–415.

726 Wade CM, Mordan PB, Clarke B (2001) A phylogeny of the land snails (Gastropoda: Pulmonata).  
727 *Proceedings. Biological sciences / The Royal Society*, **268**, 413–422.

728 Wade CM, Mordan PB, Naggs F (2006) Evolutionary relationships among the Pulmonate land snails  
729 and slugs (Pulmonata, Stylommatophora). *Biological Journal of the Linnean Society*, **87**, 593–  
730 610.

731 Ward N, Moreno-Hagelsieb G (2014) Quickly Finding Orthologs as Reciprocal Best Hits with BLAT,  
732 LAST, and UBLAST: How Much Do We Miss? *PloS one*, **9**, e101850.

733 Waterhouse RM, Tegenfeldt F, Li J, Zdobnov EM, Kriventseva E V. (2013) OrthoDB: a hierarchical  
734 catalog of animal, fungal and bacterial orthologs. *Nucleic acids research*, **41**, D358–D365.

735 Wortley AH, Rudall PJ, Harris DJ, Scotland RW (2005) How much data are needed to resolve a  
736 difficult phylogeny?: case study in Lamiales. *Systematic biology*, **54**, 697–709.

737 Xu H, Luo X, Qian J *et al.* (2012) FastUniq: A Fast De Novo Duplicates Removal Tool for Paired  
738 Short Reads. *PLoS ONE*, **7**, e52249.

739 Zapata F, Wilson NG, Howison M (2014) Phylogenomic analyses of deep gastropod relationships  
740 reject Orthogastropoda. *Proceedings of the Royal Society B: Biological Sciences*, **281**,  
741 20141739.

742

743

## 744 DATA ACCESSIBILITY

745 Raw high-throughput sequence reads and transcriptome assemblies: NCBI Bioproject

746 PRJNA304185

747 Alignments and associated information: Dryad (doi:10.5061/dryad.fn627)

748

## 749 AUTHOR CONTRIBUTIONS

750 LCT and AM designed the study. LCT lead the analysis with contribution from AM, TOH,  
751 and KDM. LCT, AM and FK collected samples. LCT and AM wrote the manuscript. All  
752 authors reviewed and edited the manuscript prior to submission.

753

754

755

756

757

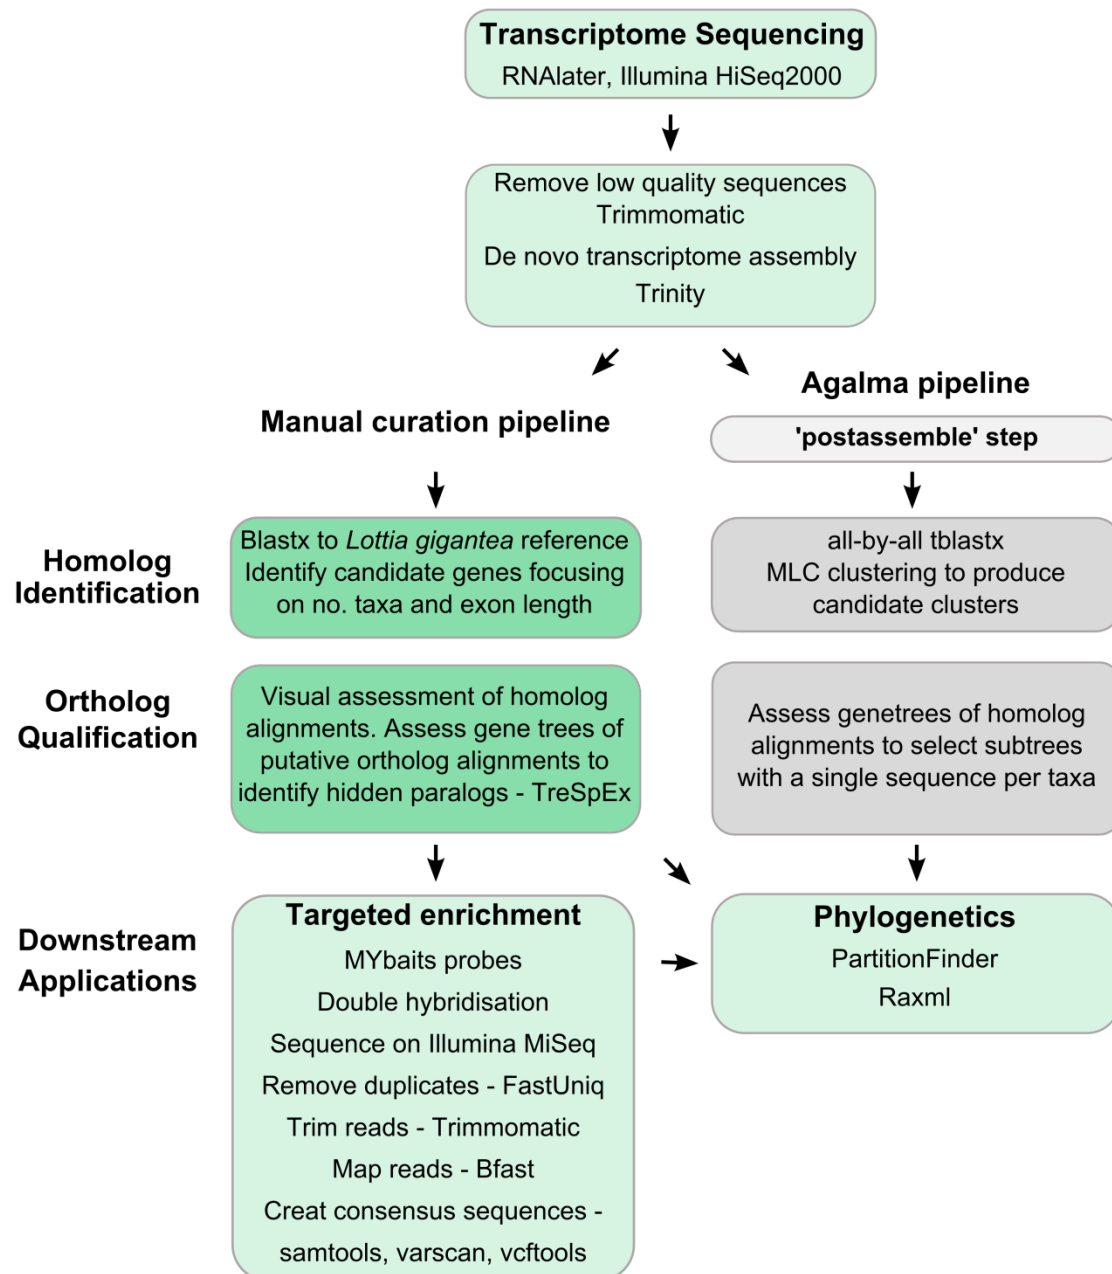

Fig. 1. *Analysis Pipelines*. Outline of the two pipelines used to detect single-copy, orthologous genes from 21 eupulmonate transcriptomes.



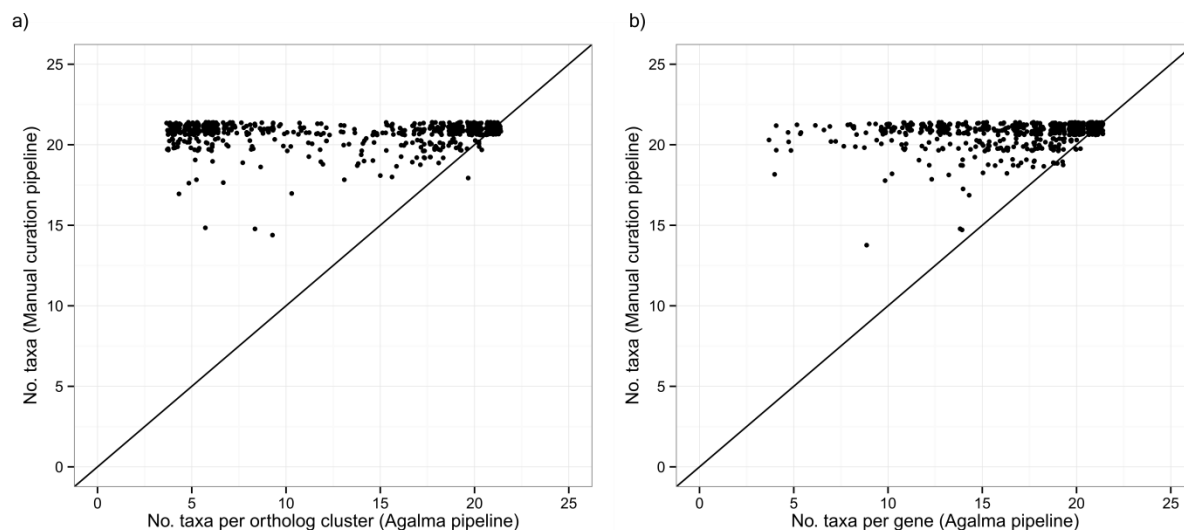

Fig. 2. A comparison between two orthology detection pipelines. (a) shows the relationship between the number of taxa per ortholog cluster for the ortholog clusters in common between the manual curation and Agalma pipelines. (b) shows the same relationship except the no of taxa for the Agalma orthologs were calculated across all ortholog clusters which represent the same gene. These graphs are plotted using geom\_jitter in ggplot2 to help visualise the large number of data points.



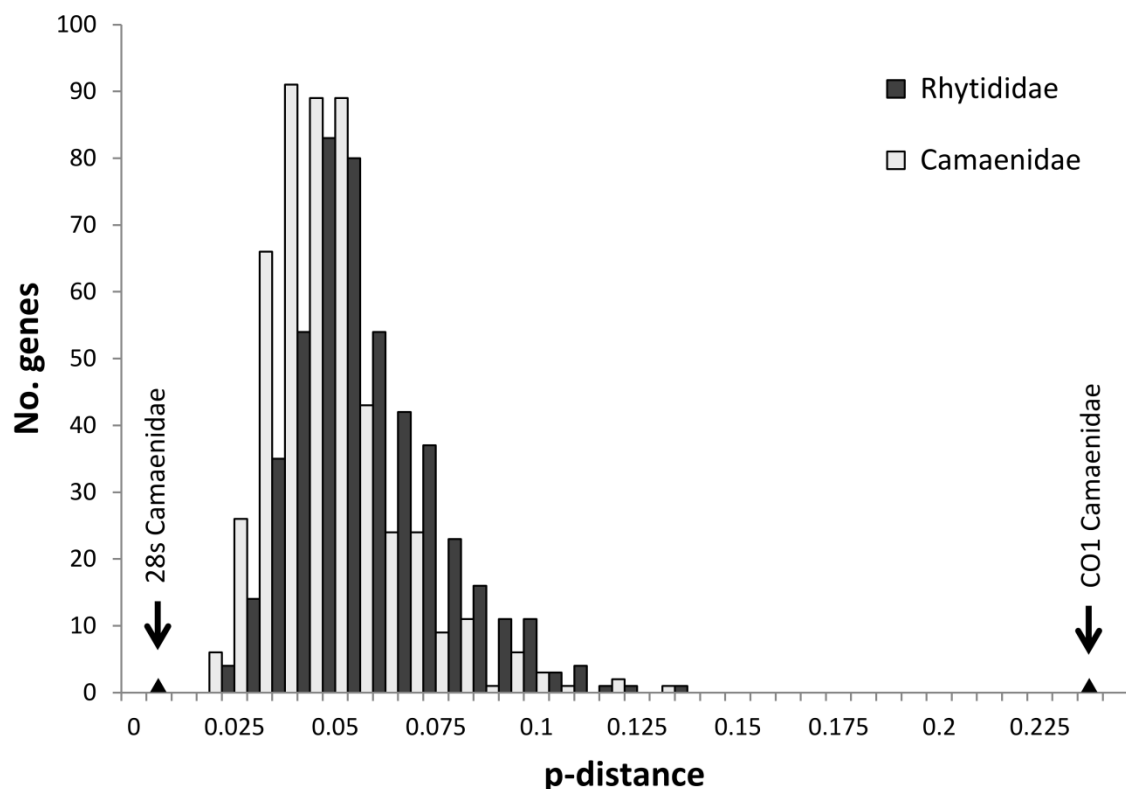

Fig. 3. Distribution of the  $p$ -distance for 500 single-copy orthologous genes across two families. Uncorrected distances for both groups were calculated using alignments of *Terrycarlessia turbinata* and *Victaphanta atramentaria* (Rhytididae), and *Austrochloritis kosciuszkoensis* and *Sphaerospira fraseri* (Camaenidae). Triangles on the x-axis notate  $p$ -distances of two commonly used phylogenetic markers, CO1 and 28S, for the Camaenidae.

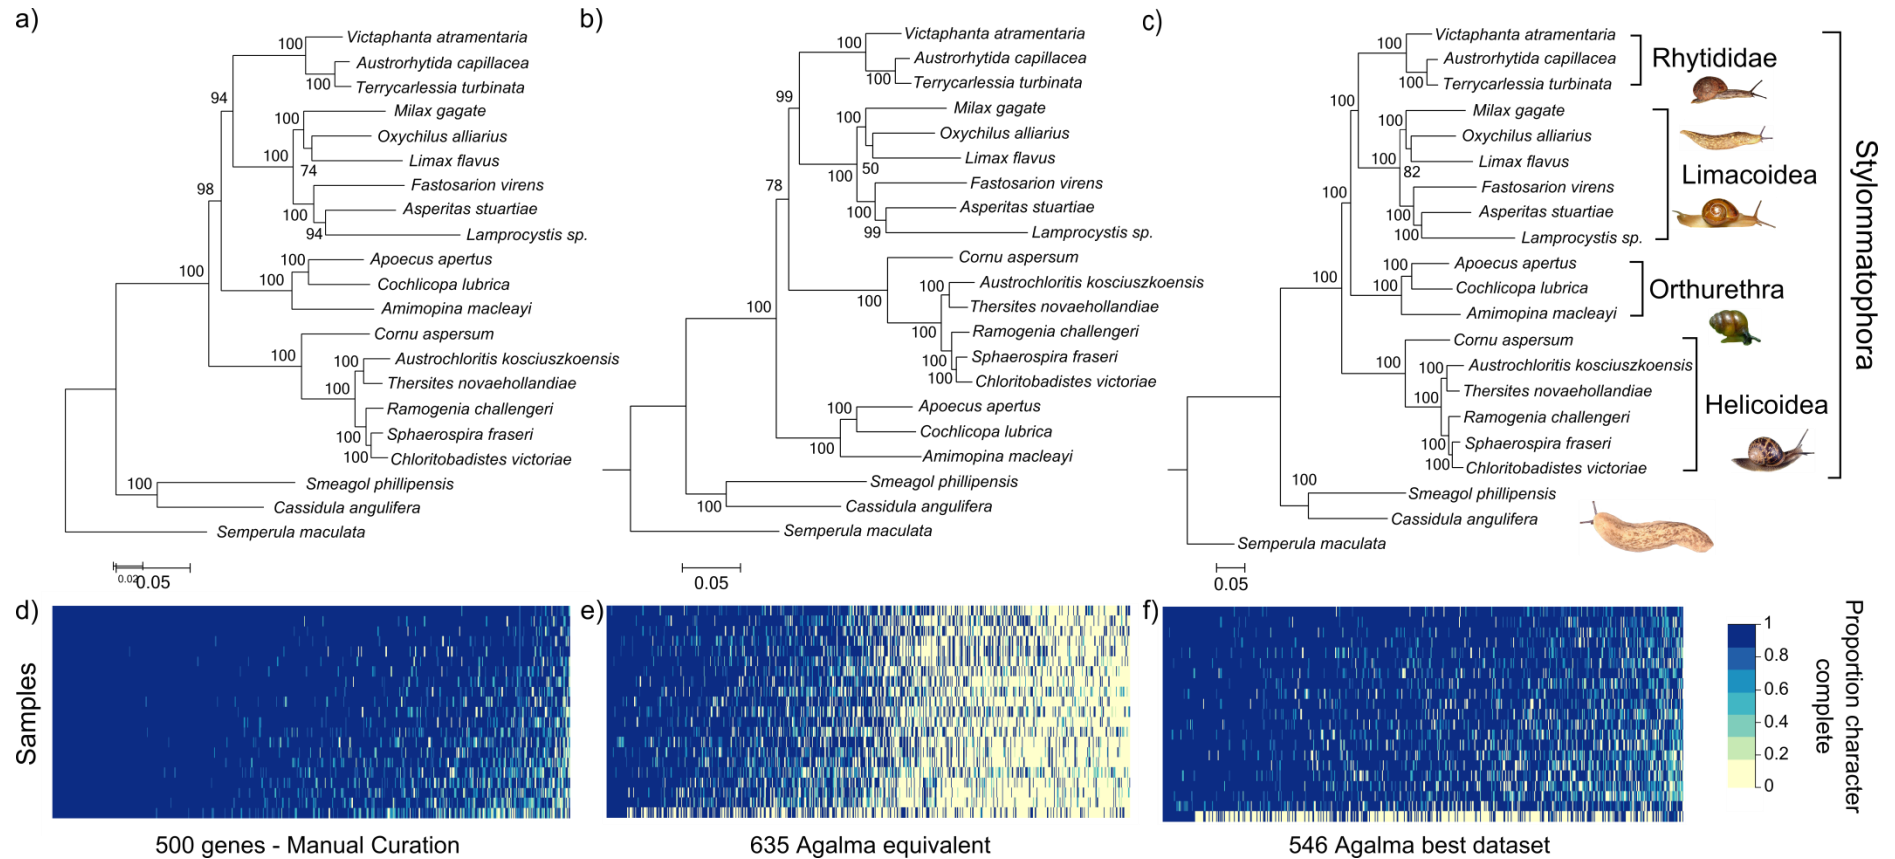

Fig. 4. *Maximum Likelihood phylogenies for 21 eupulmonates based on three datasets.* These datasets were (a) 500 nuclear single-copy, orthologous genes identified by manual curation, (b) 635 orthologous clusters identified by the automated pipeline Agalma, which correspond to the same 500 genes, and (c) 546 orthologous clusters identified by Agalma, where each orthologous cluster was the only one produced from the respective homolog cluster and had sequences for at least 18 taxa. Phylogenies are each based on analyses of amino acid sequences. Numbers on branches indicate bootstrap nodal support. Heat maps (d, e, f) indicate proportions of sequence obtained for each gene per sample for each dataset (sorted left to right by total proportion of data present per gene, top to bottom by total proportion of data present per sample).

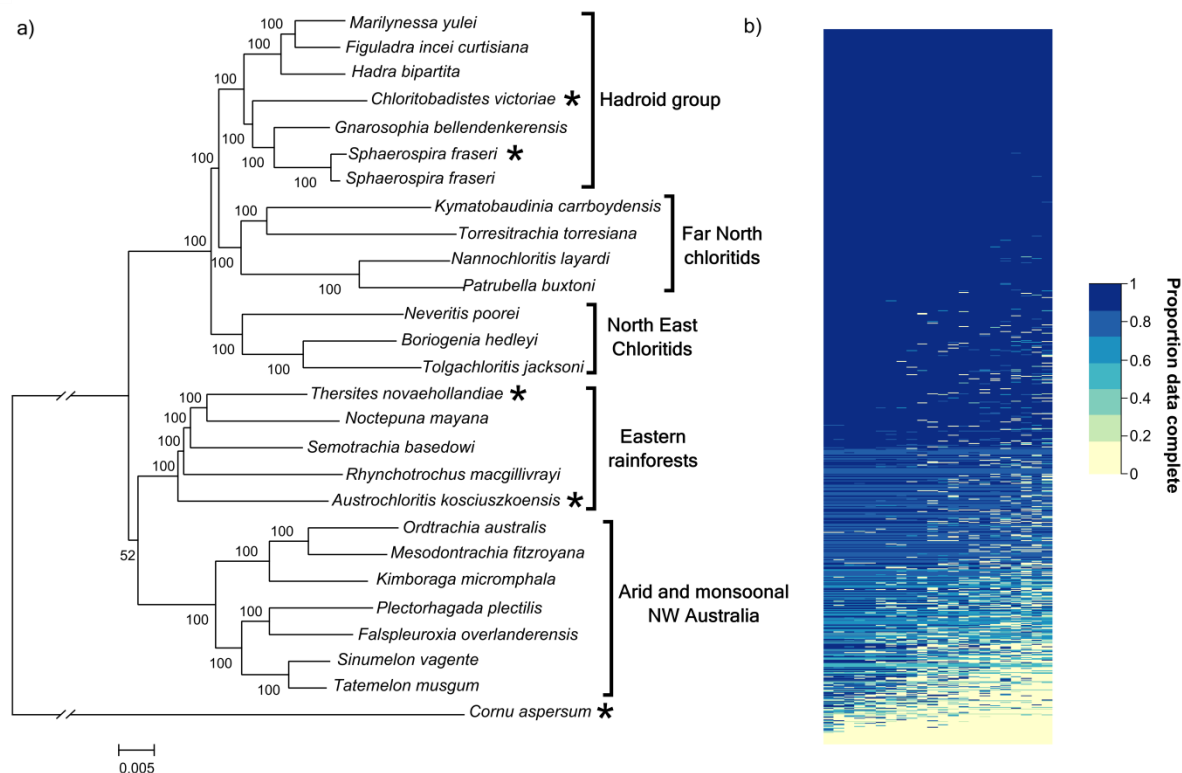

Fig. 5. *Maximum likelihood phylogeny of 26 Australian camaenid land snails.* (a) Phylogenetic reconstruction based on nucleotides sequences from 2,648 exons obtained through exon-capture. Sequences for the taxa marked with asterisks were derived from transcriptome datasets. Numbers on branches indicate bootstrap nodal support. (b) Heat map showing the proportion of available sequences for each sample per gene (sorted left to right by proportion of data present per sample; top to bottom by proportion of data present per exon).

Table 1. Taxon sampling: Transcriptome sequencing

| Superfamilies or higher unranked classification | Family         | Species                                                       | Voucher specimen | Collection locality*           |
|-------------------------------------------------|----------------|---------------------------------------------------------------|------------------|--------------------------------|
| Helicoidea                                      | Camaenidae     | <i>Austrochloritis kosciuszkoensis</i> Shea & Griffiths, 2010 | NMV F193285      | Sylvia Creek, VIC              |
| Helicoidea                                      | Camaenidae     | <i>Chloritobadistes victoriae</i> (Cox, 1868)                 | NMV F193288      | Crawford River, VIC            |
| Helicoidea                                      | Camaenidae     | <i>Ramogenia challengerii</i> (Gude, 1906)                    | NMV F193287      | Noosa, QLD                     |
| Helicoidea                                      | Camaenidae     | <i>Sphaerospira fraseri</i> (Griffith & Pidgeon, 1833)        | NMV F193284      | Noosa, QLD                     |
| Helicoidea                                      | Camaenidae     | <i>Thersites novaehollandiae</i> (Gray, 1834)                 | NMV F193248      | Comboyne, NSW                  |
| Helicoidea                                      | Helicidae      | <i>Helix aspersa</i> Müller, 1774                             | NMV F193280      | Melbourne, VIC                 |
| Limacoidea                                      | Dyakiidae      | <i>Asperitas stuartiae</i> (Pfeiffer, 1845)                   | NMV F193286      | North of Dili, Timor-Leste     |
| Limacoidea                                      | Helicarionidae | <i>Fastosarion cf virens</i> (Pfeiffer, 1849)                 | NMV F193282      | Noosa, QLD                     |
| Limacoidea                                      | Limacidae      | <i>Limax flavus</i> Linnaeus, 1758                            | NMV F193283      | Melbourne, VIC                 |
| Limacoidea                                      | Microcystidae  | <i>Lamprocystis</i> sp.                                       | AM C.476947      | Ramelau Mountains, Timor-Leste |
| Limacoidea                                      | Milacidae      | <i>Milax gagates</i> (Draparnaud, 1801)                       | NMV F226625      | Melbourne, VIC                 |
| Limacoidea                                      | Oxychilidae    | <i>Oxychilus alliarius</i> (Miller, 1822)                     | NMV F226626      | Melbourne, VIC                 |
| Orthurethra                                     | Cerastidae     | <i>Amimopina macleayi</i> (Brazier, 1876)                     | NMV F193290      | Darwin, NT                     |
| Orthurethra                                     | Cochlicopidae  | <i>Cochlicopa lubrica</i> (Müller, 1774)                      | MV614            | Blue Mountains, NSW            |
| Orthurethra                                     | Enidae         | <i>Apoecus apertus</i> (Martens, 1863)                        | AM C.488753      | Ramelau Mountains, Timor-Leste |
| Rhytidoidea                                     | Rhytididae     | <i>Austrorhytida capillacea</i> (Férussac, 1832)              | NMV F193291      | Blue Mountains, NSW            |
| Rhytidoidea                                     | Rhytididae     | <i>Terrycarlessia turbinata</i> Stanistic, 2010               | NMV F193292      | Comboyne, NSW                  |
| Rhytidoidea                                     | Rhytididae     | <i>Victaphanta atramentaria</i> (Shuttleworth, 1852)          | NMV F226627      | Toolangi, VIC                  |
| Ellobioidea                                     | Ellobiidae     | <i>Cassidula angulifera</i> (Petit, 1841)                     | NMV F193289      | Manatuto, Timor-Leste          |
| Otinoidea                                       | Smeagolidae    | <i>Smeagol phillipensis</i> Tillier & Ponder, 1992            | MVR13_138        | Phillip Is., VIC               |
| Veronicelloidea                                 | Veronicellidae | <i>Semperula maculata</i> (Templeton, 1858)                   | AM C.476934      | Manatuto, Timor-Leste          |

\*All localities within Australia unless otherwise indicated

Table 2. Taxon sampling: Transcriptome sequencing

| Species                                                      | Voucher specimen | Collection locality*            |
|--------------------------------------------------------------|------------------|---------------------------------|
| <i>Boriogenia hedleyi</i> (Fulton, 1907)                     | MV1082           | Cairns, QLD                     |
| <i>Falspleuroxia overlanderensis</i> Solem, 1997             | WAMS70235        | -                               |
| <i>Figuladra incei curtisiana</i> (Pfeiffer, 1864)           | NMV F219323      | Mt Archer, QLD                  |
| <i>Gnarosophia bellendenkerensis</i> (Brazier, 1875)         | NMV F226513      | Alligator creek, QLD            |
| <i>Hadra bipartita</i> (Férussac, 1823)                      | AM C.476663      | Green Island, QLD               |
| <i>Kimboraga micromphala</i> (Gude, 1907)                    | AM C.463554      | Windjana Gorge, WA              |
| <i>Kymatobaudinia carrboydensis</i> Criscione & Köhler, 2013 | WAM49172         | -                               |
| <i>Marilynessa yulei</i> (Forbes, 1851)                      | MV1265           | Brandy Creek, QLD               |
| <i>Mesodontrachia fitzroyana</i> Solem, 1985                 | AM C.476985      | Victoria River District, NT     |
| <i>Nannochloritis layardi</i> (Gude, 1906)                   | AM C.477826      | Somerset, QLD                   |
| <i>Neveritis poorei</i> (Gude, 1907)                         | MV1054           | Mt Elliot, QLD                  |
| <i>Noctepuna mayana</i> (Hedley, 1899)                       | AM C.478270      | Diwan, QLD                      |
| <i>Ordtrachia australis</i> Solem, 1984                      | AM C.462736      | Victoria River District, NT     |
| <i>Patrubella buxtoni</i> (Brazier, 1880)                    | AM C.478884      | Moa Is., Torres Strait          |
| <i>Plectorhagada plectilis</i> (Benson, 1853)                | WAMS70240        | -                               |
| <i>Rhynchotrochus macgillivrayi</i> (Forbes, 1851)           | AM C.478271      | Diwan, QLD                      |
| <i>Semotrachia basedowi</i> (Hedley, 1905)                   | AM C.476884      | Musgrave Ranges, WA             |
| <i>Sinumelon vagente</i> Iredale, 1939                       | WA61253          | Mt Gibson, WA                   |
| <i>Sphaerospira fraseri</i> (Griffith & Pidgeon, 1833)       | MV1104           | Benarkin State Forest, QLD      |
| <i>Tatemelon musgum</i> (Iredale, 1937)                      | AM C.476881      | Musgrave Ranges, WA             |
| <i>Tolgachloritis jacksoni</i> (Hedley, 1912)                | NMV F226521      | Mt Garnet, QLD                  |
| <i>Torresitrachia torresiana</i> (Hombron & Jacquinot, 1841) | AM C.477860      | Weipa, Cape York Peninsula, QLD |

\*All localities within Australia unless otherwise indicated

Table 3. Summary statistics for sequencing and *de novo* assembly of 21 eupulmonate transcriptomes

| Species                                | Pairs of raw reads | No. of reads after trimming | Trinity contigs | BLAST hits 1e-10 ( <i>L. gigantea</i> ) | <i>L. gigantea</i> genes with hits | No. 500 single copy genes |
|----------------------------------------|--------------------|-----------------------------|-----------------|-----------------------------------------|------------------------------------|---------------------------|
| <i>Ramogenia challengerii</i>          | 11,726,377         | 0.84                        | 103,471         | 14,665                                  | 7,011                              | 488                       |
| <i>Austrochloritis kosciuszkoensis</i> | 11,357,080         | 0.85                        | 107,810         | 16,238                                  | 7,522                              | 495                       |
| <i>Sphaerospira fraseri</i>            | 31,594,841         | 0.85                        | 179,695         | 23,910                                  | 9,433                              | 500                       |
| <i>Thersites novaehollandiae</i>       | 15,620,892         | 0.85                        | 118,298         | 17,330                                  | 7,869                              | 492                       |
| <i>Chloritobadistes victoriae</i>      | 26,433,009         | 0.85                        | 148,817         | 20,453                                  | 8,792                              | 498                       |
| <i>Amimopina macleayi</i>              | 7,874,195          | 0.97                        | 93,250          | 17,258                                  | 8,091                              | 494                       |
| <i>Cochlicopa lubrica</i>              | 8,074,560          | 0.97                        | 111,396         | 21,675                                  | 9,086                              | 497                       |
| <i>Asperitas stuartiae</i>             | 9,322,853          | 0.97                        | 104,942         | 15,491                                  | 7,460                              | 491                       |
| <i>Cassidula angulifera</i>            | 14,281,906         | 0.97                        | 105,803         | 16,981                                  | 8,083                              | 489                       |
| <i>Apoecus cf apertus</i>              | 9,362,182          | 0.97                        | 119,711         | 21,275                                  | 9,095                              | 497                       |
| <i>Fastosarion cf virens</i>           | 14,904,669         | 0.84                        | 127,454         | 18,306                                  | 7,987                              | 494                       |
| <i>Cornu aspersum</i>                  | 21,273,910         | 0.86                        | 160,490         | 23,114                                  | 9,254                              | 498                       |
| <i>Limax flavus</i>                    | 14,907,395         | 0.84                        | 116,088         | 19,071                                  | 8,349                              | 497                       |
| <i>Lamprocystis</i> sp.                | 22,539,699         | 0.97                        | 128,611         | 23,797                                  | 9,679                              | 499                       |
| <i>Milax gagates</i>                   | 11,263,950         | 0.97                        | 92,337          | 16,541                                  | 7,041                              | 490                       |
| <i>Oxychilus alliarius</i>             | 12,925,111         | 0.97                        | 136,044         | 21,183                                  | 8,940                              | 499                       |
| <i>Terrycarlessia turbinata</i>        | 16,985,068         | 0.84                        | 141,421         | 17,073                                  | 7,778                              | 489                       |
| <i>Victaphanta atramentaria</i>        | 11,312,274         | 0.86                        | 101,127         | 16,584                                  | 7,466                              | 490                       |
| <i>Austrorhytida capillacea</i>        | 10,154,817         | 0.96                        | 88,525          | 15,352                                  | 7,118                              | 477                       |
| <i>Smeagol phillipensis</i>            | 6,393,571          | 0.96                        | 95,429          | 23,067                                  | 9,699                              | 497                       |
| <i>Semperula maculata</i>              | 12,461,924         | 0.97                        | 76,847          | 21,851                                  | 9,276                              | 492                       |

Table 4. Sequencing and mapping summary statistics for the exon capture experiment.

| Species                              | No. raw paired end reads | Portion of pairs of reads retained after duplicate removal | Portion retained after Trimmomatic | Proportion of reads mapped to the final reference | Average coverage per exon | Proportion of exons captured (total 2648 exons) |
|--------------------------------------|--------------------------|------------------------------------------------------------|------------------------------------|---------------------------------------------------|---------------------------|-------------------------------------------------|
| <i>Boriogenia hedleyi</i>            | 836,437                  | 0.60                                                       | 0.97                               | 0.64                                              | 145                       | 0.96                                            |
| <i>Falspleuroxia overlanderensis</i> | 170,769                  | 0.69                                                       | 0.98                               | 0.74                                              | 41                        | 0.88                                            |
| <i>Figuladra incei curtisiana</i>    | 1,117,954                | 0.57                                                       | 0.96                               | 0.6                                               | 167                       | 0.97                                            |
| <i>Gnarosophia bellendenkerensis</i> | 1,490,686                | 0.57                                                       | 0.98                               | 0.63                                              | 235                       | 0.98                                            |
| <i>Hadra bipartita</i>               | 659,509                  | 0.6                                                        | 0.98                               | 0.7                                               | 131                       | 0.96                                            |
| <i>Kimboraga micromphala</i>         | 186,942                  | 0.86                                                       | 0.99                               | 0.73                                              | 55                        | 0.90                                            |
| <i>Kymatobaudinia carrboydensis</i>  | 666,965                  | 0.78                                                       | 0.98                               | 0.63                                              | 145                       | 0.94                                            |
| <i>Marilynessa yulei</i>             | 865,712                  | 0.56                                                       | 0.97                               | 0.62                                              | 139                       | 0.97                                            |
| <i>Mesodontrachia fitzroyana</i>     | 429,572                  | 0.85                                                       | 0.98                               | 0.61                                              | 102                       | 0.91                                            |
| <i>Nannochloritis layardi</i>        | 179,432                  | 0.86                                                       | 0.97                               | 0.72                                              | 50                        | 0.90                                            |
| <i>Neveritis poorei</i>              | 1,313,049                | 0.57                                                       | 0.96                               | 0.62                                              | 205                       | 0.95                                            |
| <i>Noctepuna mayana</i>              | 297,503                  | 0.77                                                       | 0.98                               | 0.73                                              | 81                        | 0.93                                            |
| <i>Ordtrachia australis</i>          | 670,743                  | 0.65                                                       | 0.94                               | 0.86                                              | 222                       | 0.92                                            |
| <i>Patrubella buxtoni</i>            | 492,474                  | 0.82                                                       | 0.97                               | 0.7                                               | 125                       | 0.92                                            |
| <i>Plectorhagada plectilis</i>       | 220,636                  | 0.81                                                       | 0.98                               | 0.76                                              | 65                        | 0.90                                            |
| <i>Rhynchotrochus macgillivrayi</i>  | 340,338                  | 0.85                                                       | 0.98                               | 0.7                                               | 96                        | 0.92                                            |
| <i>Semotrachia basedowi</i>          | 290,966                  | 0.92                                                       | 0.88                               | 0.83                                              | 119                       | 0.92                                            |
| <i>Sinumelon vagente</i>             | 282,838                  | 0.86                                                       | 0.97                               | 0.75                                              | 86                        | 0.92                                            |
| <i>Sphaerospira fraseri</i>          | 796,591                  | 0.56                                                       | 0.98                               | 0.66                                              | 130                       | 0.98                                            |
| <i>Tatemelon musgum</i>              | 242,614                  | 0.87                                                       | 0.99                               | 0.7                                               | 66                        | 0.91                                            |
| <i>Tolgachloritis jacksoni</i>       | 1,207,039                | 0.38                                                       | 0.97                               | 0.65                                              | 139                       | 0.95                                            |
| <i>Torresitrachia torresiana</i>     | 192,031                  | 0.87                                                       | 0.98                               | 0.74                                              | 61                        | 0.90                                            |
